# Interspecies malate-pyruvate shuttle drives amino acid exchange in organohalide-respiring microbial communities

Po-Hsiang Wang<sup>1\*</sup>, Kevin Correia<sup>1\*</sup>, Han-Chen Ho<sup>1</sup>, Naveen Venayak<sup>1</sup>, Kayla Nemr<sup>1</sup>, Robert Flick<sup>1</sup>, Radhakrishnan Mahadevan<sup>1,#</sup> and Elizabeth A. Edwards<sup>1,#</sup>

<sup>1</sup>Department of Chemical Engineering and Applied Chemistry, University of Toronto, Toronto, Ontario, M5S 3E5, Canada.

**Running Title:** Amino acid exchange in anaerobic microbial communities

**Keywords:** Metabolic modeling; amino acid cross-feedings; syntrophy; serine biosynthesis; NADPH regeneration; malate-pyruvate shuttle; *Dehalobacter*, *Bacteroides*; organohalide respiration

<sup>#</sup> Corresponding author. Mailing address: University of Toronto, 200 College St., Toronto, Ontario, M5S 3E5,

Canada. Phone: (416) 946-0996. Fax: (416) 978-8605.

E-mail: [elizabeth.edwards@utoronto.ca](mailto:elizabeth.edwards@utoronto.ca); [krishna.mahadevan@utoronto.ca](mailto:krishna.mahadevan@utoronto.ca)

\*These authors contributed equally to this work.

The authors declare no conflict of interest.

## Abstract

1  
2 Most microorganisms in the biosphere live in communities and develop coordinated  
3 metabolisms via trading metabolites. In this study, we sought to deconstruct the metabolic  
4 interdependency in organohalide-respiring microbial communities enriched with *Dehalobacter*  
5 *restrictus* (*Dhb*), using a complementary approach of computational metabolic modeling and  
6 experimental validation. *Dhb* possesses a complete set of genes for amino acid biosynthesis yet  
7 requires amino acid supplementation. We reconciled this discrepancy using Flux Balance  
8 Analysis with consideration for cofactor availability, enzyme promiscuity, and shared protein  
9 expression patterns of several *Dhb* strains. Experimentally, <sup>13</sup>C incorporation assays, growth  
10 assays, and metabolite analysis of strain PER-K23 cultures were performed to validate the model  
11 predictions. The model resolved that *Dhb*'s amino acid dependency results from restricted  
12 NADPH regeneration and diagnosed that malate supplementation can replenish intracellular  
13 NADPH using malic enzyme. Interestingly, we observed unexpected export of glutamate and  
14 pyruvate in parallel to malate consumption in the strain PER-K23 cultures. Further experiments  
15 on *Dhb*-enriched consortium ACT-3 suggested an interspecies malate-pyruvate shuttle between  
16 *Dhb* and a glutamate-auxotrophic *Bacteroides* sp., reminiscent of the mitochondrial malate shunt  
17 pathway in eukaryotic cells. Altogether, this study reveals that redox constraints and metabolic  
18 complementarity are important driving forces for amino acid exchange in anaerobic microbial  
19 communities.

20

21

22

23

## 24 **Introduction**

25 Prokaryotic microorganisms ubiquitously inhabit the biosphere, forming close  
26 associations with one another. The study of microbial communities is gaining importance due to  
27 their essential contributions in global element cycling, agriculture, bioremediation, human health  
28 and industrial biotechnology (Dolfing, 2013, Embree *et al.*, 2015, Mee *et al.*, 2014, Zhao *et al.*,  
29 2014). The interactions among microorganisms and their surroundings form phenotypes that can  
30 be observed in ecosystems, and are classified into three main categories: syntrophy, cross-  
31 feeding, and competition (Seth and Taga, 2014). Several methods have been proposed to  
32 elucidate these complex interactions, including microbial co-association network analysis as a  
33 function of time and other external factors (Cardona *et al.*, 2016).

34 Metabolic complementarity is a driving force for microbial mutualism (Mori *et al.*, 2016,  
35 Wintermute and Silver, 2010). While mutualism confers robustness to a microbial community, a  
36 trade-off is that the coevolved microbes within are susceptible to the loss of non-essential  
37 functions via genome streamlining, which can lead to auxotrophy in other environments  
38 (McCutcheon and Moran, 2012). As a result, isolation of microorganisms from their syntrophic  
39 partners or natural niches is often challenging, as demonstrated by the scarcity of culturable  
40 isolates in the laboratory (~2%) (Wade, 2002). An alternative approach is metabolic modeling  
41 based on microbial genomes (Manor *et al.*, 2014, Roling and van Bodegom, 2014, Tan *et al.*,  
42 2015). Genome-scale constraint-based metabolic models have been increasingly used to  
43 elucidate metabolic networks at the community level (Magnúsdóttir and Thiele, 2018, Zhuang *et*  
44 *al.*, 2011). Nevertheless, physiological information and genome annotation verification for  
45 organisms in complex communities are often lacking, which results in the inclusion of mis-  
46 annotated genes and non-gene associated reactions (Suthers *et al.*, 2009), rendering simulations

47 to be physiologically irrelevant. Integration of laboratory experiments with metabolic modeling  
48 can significantly improve the accuracy of prediction (Amador-Noguez *et al.*, 2010), as  
49 demonstrated in the study of amino acid cross-feedings in synthetic *E. coli* communities (Mee *et*  
50 *al.*, 2014).

51 Anaerobic organic mineralization requires tightly coupled metabolic coordination  
52 between microbes due to redox and thermodynamic constraints (McInerney *et al.*, 2009, Sieber  
53 *et al.*, 2012). The presence of external electron acceptors enables more complex communities to  
54 develop. Organohalide-respiring microbial communities are great models to study metabolic  
55 interdependency between microbes because they are often co-inhabited by acetogens, fermenting  
56 bacteria, methanogens, sulfate-reducing bacteria, and organohalide-respiring bacteria (OHRB)  
57 (Adrian and Loeffler, 2016, Duhamel and Edwards, 2007). *Dehalobacter restrictus* (*Dhb*) strains  
58 are specialized in respiring a variety of organohalides (Holliger *et al.*, 1998, Justicia-Leon *et al.*,  
59 2012, Tang *et al.*, 2016, van Doesburg *et al.*, 2005, Wang *et al.*, 2014, Wong *et al.*, 2016,  
60 Yoshida *et al.*, 2009). All isolated *Dhb* strains, with the exception of strain UNSWDHB, require  
61 the addition of either amino acids or parent culture supernatants to support growth (Holliger *et*  
62 *al.*, 1998, Wang *et al.*, 2016), indicating unexplored nutrient cross-feedings from symbiotic  
63 partners in natural habitats, e.g. the *Bacteroides* sp. (*Bac*) in the strain CF-enriched consortium  
64 ACT-3 (Tang and Edwards, 2013b). However, comparative genomic analysis and refined  
65 metabolic annotation suggested that *Dhb* possesses a complete set of genes to synthesize all  
66 amino acids, including a salvage pathway to obtain serine from threonine (Tang *et al.*, 2016,  
67 Wang *et al.*, 2016).

68 In this study, we first explored the metabolic dependency of *Dhb* using its genome-scale  
69 metabolic model (Correia *et al.*, 2018), which was built based on a highly annotated and

70 experimentally refined *Dhb* genome (Wang et al, 2016), along with shared expression patterns in  
71 proteomic datasets of *Dhb* strains PER-K23, UNSWDHB, DCA and CF (Jugder *et al.*, 2016,  
72 Rupakula *et al.*, 2013, Rupakula *et al.*, 2015, Tang and Edwards, 2013a). The model simulations  
73 consider cofactor availability, enzyme promiscuity, physiological redox conditions, and further  
74 model constraints based on experimental values obtained in this study. We resolved that *Dhb*'s  
75 amino acid dependency results from restricted NADPH regeneration, which can be restored with  
76 malate supplementation via the function of NADP<sup>+</sup>-dependent malic enzyme. The strain PER-  
77 K23 cultures grown on the model-resolved medium exhibited an unexpected export of pyruvate,  
78 glutamate, and other amino acids in parallel to malate consumption. Further experimental  
79 analysis on the strain CF-enriched consortium ACT-3 revealed that *Dhb*'s specialized malate  
80 requirement is likely a consequence of genome streamlining, which was driven by co-adaption  
81 with a glutamate-auxotrophic, malate-producing *Bacteroides* sp. to effectively accomplish  
82 intercellular trading of reducing equivalents (i.e. NADH and NADPH) via organic acid exchange.

## 83 **Materials and Methods**

84 All Chemicals were ordered from Sigma-Aldrich (Oakville, ON, Canada) at highest  
85 purity available unless specified otherwise.

86 **Flux balance analysis (FBA).** The experimentally refined genome of *D. restrictus* strain CF  
87 (accession no. NC\_018866) (Wang et al, 2016) was used to reconstruct a draft *Dhb* genome-  
88 scale metabolic model (Correia *et al.*, 2018). Flux balance analysis and flux variability analysis  
89 simulations were conducted with COBRApy (Ebrahim *et al.*, 2013). Constraints were applied to  
90 the genome-scale metabolic model based on five considerations to improve the accuracy of flux  
91 distributions with *Dhb*: (i) consideration of cofactor availability for the corresponding metabolic  
92 reactions; (ii) shared features in available proteomes of *Dhb* strains (**Table S1**); (iii)

93 consideration of cellular redox state under given growth conditions; (iv) consideration of  
94 potential promiscuous enzyme activity to rescue missing pathways; (v) integration of  
95 experimental values from culture growth assays and metabolite profile analysis. Based on these  
96 considerations, constraints were applied to the model by the following four actions: (a)  
97 inactivating targeted reactions, (b) limiting the direction of targeted reactions (making reactions  
98 irreversible), (c) applying experimentally relevant metabolite flux, and (d) disabling/enabling the  
99 export of metabolites (**Table S2**).

100 **Microbial cultures and growth conditions.** *Dhb* strain PER-K23 was provided by the Löffler  
101 Lab at University of Tennessee (Knoxville, USA). *Escherichia coli* strain BL21(DE3) was  
102 purchased from New England Biolabs Ltd. Consortium ACT-3 was originally enriched from  
103 1,1,1-trichloroethane-contaminated groundwater in 2001 from a northeastern United States  
104 industrial area (Grostern and Edwards, 2006), and a subculture (1.8 l) was adapted to respire  
105 chloroform (Grostern *et al.*, 2010). *E. coli* strain BL21 was grown on LB broth except in the <sup>13</sup>C  
106 incorporation assay. The strain PER-K23 cultures and the consortium ACT-3 are maintained in a  
107 FeS-reduced, bicarbonate-based mineral medium described previously (Grostern *et al.*, 2010,  
108 Wang *et al.*, 2016). The growth assays for the strain PER-K23 cultures and consortium ACT-3  
109 were performed following the established protocol reported previously with some modifications  
110 (Tang and Edwards, 2013a, Wang *et al.*, 2016) (described in **SI**).

111 **<sup>13</sup>C incorporation assay.** The <sup>13</sup>C incorporation assay was performed following a previous study  
112 on amino acid biosynthesis of *Dehalococcoides* with some modifications (Zhuang *et al.*, 2014)  
113 (described in **SI**).

114 **DNA extraction, quantitative PCR, and Illumina amplicon sequencing.** Culture DNA was  
115 extracted from 2 ml samples. Cells were harvested by centrifugation at 16 000 x g for 10 min at

116 4°C. Since *Dhb* cell pellets are easily resuspended, in each tube, most of supernatant was remove  
117 (1.9 ml), and the cell pellets were resuspended using the remaining supernatant (0.1 ml), and the  
118 DNA was extracted using the MO BIO PowerSoil® DNA isolation kit following the  
119 manufacturer's recommendations. Real-time quantitative polymerase chain reaction (qPCR)  
120 assays were performed to track the gene copy numbers of *Dhb* using specific 16S rRNA gene  
121 primers reported previously (F: 5'-GAT TGA CGG TAC CTA ACG AGG-3'; R: 5'-TAC AGT  
122 TTC CAA TGC TTT ACG-3') (Puentes Jácome and Edwards, 2017) (described in **SI**). For the  
123 16S rRNA gene-based population analysis, the ACT-3 sub-transfer cultures (2 ml) from each  
124 triplicate trials were combined, and the DNA were extracted as described above. The DNA  
125 samples were sent to the Genome Quebec Innovation Centre (McGill University, Canada) for  
126 Illumina MiSeq amplicon sequencing. After sequencing, the raw data were processed following  
127 an established pipeline described previously (Chen *et al.*, 2018). The assemblage of pair-end  
128 reads, primer removal, quality filtering, chimera and singleton detections, and read number  
129 normalization were implemented using the sequence analysis tool USEARCH, and the  
130 taxonomic assignment of OTUs was performed against the Silva database (version 128;  
131 <https://www.arb-silva.de/documentation/release-128/>). The taxonomic assignment and  
132 abundance of individual OTUs is available in **Table S3**.

133 **Phylogenetic analysis.** The species tree was created with a modified method recently published  
134 (Hug *et al.*, 2016). Briefly, 10 ribosome protein subunits in the selected bacterial species were  
135 independently aligned with MAFFT v7.245, trimmed to remove unaligned N and C termini  
136 residues using default parameters with Gblocks version 0.91b (Talavera and Castresana, 2007),  
137 and concatenated to reconstruct a maximum likelihood tree with 100 bootstrap values using  
138 PHYML v3.2.0 (Guindon *et al.*, 2010). Ortholog groups were predicted via OrthoMCL (Fischer

139 *et al.*, 2011) and OrthoDB (Zdobnov *et al.*, 2016). Enzyme orthologs were mapped to the species  
140 tree with Evolview v2 (He *et al.*, 2016).

141 **Enzyme activity assays.** The conditions for cell extract preparation and dehalogenase activity  
142 assays were described previously (Wang *et al.*, 2016), and o-phosphoserine phosphatase activity  
143 assay were conducted following established protocols with some modifications (described in **SI**)  
144 (Kuznetsova *et al.*, 2006). The enzyme activity is defined as  $\mu\text{mol product produced min}^{-1} \text{ mg}$   
145  $\text{protein}^{-1}$ .

146 **Analytical procedures.** Chlorinated hydrocarbons were measured by injecting a 0.3 ml  
147 headspace sample into a Hewlett-Packard 5890 Series II GC fitted with a GSQ column (30-m-  
148 by-0.53-mm [inner diameter] PLOT column; J&W Scientific, Folsom, CA) as described  
149 previously (Wang *et al.*, 2016). For the metabolite profile analysis, in an anaerobic chamber  
150 (Coy), each culture was sampled (0.2 ml), and gently filtered through a 0.1  $\mu\text{m}$ -pore-size syringe  
151 filter (Millipore). The flow-through was collected in a plastic microcentrifuge tube, followed by  
152 a centrifugation at 16 000 x g for 10 min at 4°C. The supernatants were stored at -80°C before  
153 analysis. The amount of acetate, malate and pyruvate from *Dhb* strain PER-K23 cultures was  
154 determined by HPLC using an ICS5000 system (Thermo scientific) equipped with an Aminex  
155 HPX-87H column (BioRad) connected to a UV detector. Each sample (25  $\mu\text{l}$ ) was injected onto  
156 the column incubated at 35°C, using 5 mM H<sub>2</sub>SO<sub>4</sub> eluent at a flow rate of 0.6 ml<sup>-1</sup> min with the  
157 UV wavelength set to 210 nm. Amino acids and organic acids were detected using Liquid  
158 chromatography Electrospray-coupled high resolution mass spectrometry (LC-ESI-HRMS) with  
159 a Dionex UHPLC system and a Q-Exactive mass spectrometer (Thermo Scientific) equipped  
160 with a HESI II source (Thermo Scientific) and a Micro-splitter valve (IDEX Health & Science)  
161 (described in **SI**).



## 162 **Results and Discussion**

### 163 **Serine biosynthesis in *Dhb* via threonine**

164 Our research efforts have been devoted to refining the genome annotation on the central  
165 metabolism and biosynthesis of amino acids/cofactors in *Dhb* (Wang et al, 2016). Common  
166 features among *Dhb* genomes are gaps in the TCA cycle and serine biosynthesis. To increase  
167 accuracy in model reconstruction, we analyzed the presence/absence of enzyme orthologs  
168 involved in these metabolic pathways in a range of OHRB species, *Firmicutes* species,  
169 *Bacteroides* species, and selected model organisms in Bacteria (**Figure 1**). Malate  
170 dehydrogenase and succinate dehydrogenase/fumarate reductase genes appear to have been  
171 recently lost in *Dhb*. The membrane-bound transhydrogenase PntAB is absent in *Dhb* and many  
172 Firmicutes species, reducing their flexibility in NADH/NADPH metabolism. Interestingly, the  
173 orthologs of o-phosphoserine phosphatase (SerB; EC 3.1.3.3), the enzyme catalyzing the final  
174 step in the classical serine biosynthesis pathway (Greenberg and Ichihara, 1957), are notably  
175 absent in Firmicutes. Conservation of SerA in most Firmicutes likely results from the  
176 overlapping biosynthesis pathway between serine and pyridoxine, an essential cofactor involved  
177 in central metabolism (**Figure 1**) (Lam and Winkler, 1990). Previously, we found a promiscuous  
178 serine hydroxymethyltransferase (Shmt; EC 2.1.2.1) possessing threonine aldolase activity in  
179 *Dhb*, which allows serine salvage from threonine (**Figure 2A**). Moreover, this promiscuous  
180 serine hydroxymethyltransferase is expressed in all available *Dhb* proteomes (**Table S1**). To  
181 exclude the possibility that a phylogenetically distant SerB or a promiscuous phosphatase with  
182 SerB-like activity is present in *Dhb*, we first examined the growth of strain PER-K23 cultures  
183 with only acetate or with acetate and serine. Dechlorination was only observed in cultures  
184 supplemented with both acetate and serine (**Figure S1A**). We then examined potential

185 promiscuous phosphatase activity in *Dhb* cell lysates. While we observed dehalogenase activity  
186 in assays containing the *Dhb* cell lysates, SerB-like activity was only observed in assays  
187 containing *E. coli* cell lysates (positive control) (**Figure 2B**). These preliminary results indicate  
188 that SerB-dependent classical serine biosynthesis pathway is not functioning in *Dhb* cells.

189 Subsequently, we followed  $^{13}\text{C}$  incorporation to elucidate serine biosynthesis in *Dhb*. [3-  
190  $^{13}\text{C}$ ]pyruvate or unlabeled pyruvate (5 mM), a precursor of serine in the classical pathway  
191 (**Figure 2A**) (Grundy and Henkin, 2002), was supplemented to Holliger medium (Holliger *et al.*,  
192 1998, Wang *et al.*, 2016) containing 1 mM acetate and 0.1 mM of arginine, histidine, and  
193 threonine to cultivate strain PER-K23 cultures. Therefore, the 3- $^{13}\text{C}$  on pyruvate would be  
194 incorporated into serine if *Dhb* synthesizes serine via the classical pathway (**Figure 2A**), and MS  
195 analysis of isotopomer distribution would reveal an enrichment in relative abundance of the M1  
196 isotopomer of serine (M1/M0). By contrast, the M1 serine isotopomer would remain at natural  
197 abundance if *Dhb* salvages serine from threonine. Consistently, serine obtained from both  
198 unlabeled pyruvate-fed and [3- $^{13}\text{C}$ ]pyruvate-fed *Dhb* cells revealed a comparable M1/M0  
199 (4.2~4.7%) (**Figure 2C**). By contrast, alanine, aspartate, and glutamate obtained from [3-  
200  $^{13}\text{C}$ ]pyruvate-fed *Dhb* cells revealed at least 3-fold enrichment in M1/M0 (~15%). Altogether,  
201 based on genome annotation and multiple lines of experimental evidence, the classical serine  
202 biosynthesis pathway is absent in *Dhb*, and serine is synthesized from the salvage pathway.  
203 Interestingly, this salvage pathway is likely a major route for serine biosynthesis in SerB-lacking  
204 Firmicutes and in *Geobacter* spp. (**Figure 1**) (Sung, et al 2006).

### 205 **Restricted NADPH regeneration in *Dhb***

206 The absence of the classical serine biosynthesis pathway in *Dhb* can result in many  
207 metabolic defects because serine is the cellular  $\text{C}_1$  pool donor and the precursor of purines and

208 other amino acids (**Figure 3A**) (Fan *et al.*, 2014). Recent studies also discovered that serine can  
209 support NADPH regeneration via the folate cycle (**Figure 3A**) (Fan *et al.*, 2014, Tedeschi *et al.*,  
210 2013). Furthermore, biosynthesis of serine and serine-derived amino acids through the classical  
211 pathway is NADPH-independent (embedded table in **Figure 3B**) (Grundy and Henkin, 2002). By  
212 contrast, using threonine to synthesize serine would elevate cellular demand of NADPH for  
213 amino acid synthesis by approximately 30%, assuming a protein composition similar to that of  
214 *Bacillus subtilis* (Dauner and Sauer, 2001).

215         According to *Dhb* genome annotation, seven potential enzyme reactions can contribute to  
216 NADPH regeneration (**Figure 3A**), including a putative ferredoxin:NADP<sup>+</sup> oxidoreductase  
217 (NfnAB; EC 1.6.1.4); a putative NADP<sup>+</sup>-reducing hydrogenase (HndABCD; EC 1.12.1.3);  
218 isocitrate dehydrogenase (EC 1.1.1.42); NADP-dependent malic enzyme (MAE; EC 1.1.1.40);  
219 MoCo-dependent NADP<sup>+</sup>-specific formate dehydrogenase (FdhAB; EC 1.2.1.43); and 5,10-  
220 methylenetetrahydrofolate reductase/dehydrogenase (MetF; EC 1.5.1.20; FOLD; EC 1.5.1.5).  
221 However, *Dhb* cannot synthesize the molybdopterin cofactor (Wang *et al.*, 2016) to functionalize  
222 formate dehydrogenase. Also, given that *Dhb* employs the TCA cycle and Wood–Ljungdahl  
223 pathway for anabolism but not respiration, the generated NADPH from isocitrate dehydrogenase  
224 and 5,10-methylenetetrahydrofolate reductase/dehydrogenase is insufficient to support *Dhb*  
225 anabolism using simple carbon sources like acetate. Finally, the putative NADP<sup>+</sup>-reducing  
226 hydrogenase was not expressed in all the available *Dhb* proteomes, with the putative  
227 ferredoxin:NADP<sup>+</sup> oxidoreductase only being expressed in the strain UNSWDHB proteome  
228 (**Table S1**). Consistently, strain UNSWDHB was reported to grow on acetate as the sole carbon  
229 source (Wong *et al.*, 2016) and was isolated from an acetate/H<sub>2</sub>-fed enrichment, while strains  
230 PER-K23, CF, and DCA were isolated from lactate-fed enrichment cultures (Grostern and

231 Edwards, 2006, Holliger *et al.*, 1993). Such difference in ferredoxin:NADP<sup>+</sup> oxidoreductase  
232 expression among *Dhb* strains is likely a result of niche specialization driven by bacterial  
233 epigenetic change (e.g. DNA methylation) responding to environmental conditions (Casadesús  
234 and Low, 2006).

235         Among the seven NADPH-regenerating enzymes, MAE can replenish the intracellular  
236 NADPH pool with malate supplementation (**Figure 3A**). Also, *Dhb* genomes possess malate  
237 permease (*maeP*; Accession K4LDY2) to uptake malate, with MAE being significantly  
238 expressed in the proteomes of all *Dhb* strains (**Table S1**). Thus we examined if malate  
239 supplementation can support *Dhb* growth on the acetate-based defined medium. Consistently,  
240 strain PER-K23 cultures supplemented with acetate and malate showed a three-fold faster  
241 dechlorination rate than that of cultures supplemented with acetate and serine (**Figure S1A**).  
242 Supplementing acetate, malate and serine to strain PER-K23 cultures resulted in the highest  
243 dechlorination rate (100 µM bottle<sup>-1</sup> day<sup>-1</sup>). Therefore, the lack of SerB and restricted NADPH  
244 regeneration system is likely the result of *Dhb*'s amino acid dependency.

#### 245 **Unexpected pyruvate export in *Dhb* cultures**

246         To examine the hypothesis of restricted NADPH regeneration in *Dhb*, we performed  
247 three consecutive 1% transfers of strain PER-K23 cultures using the defined medium  
248 supplemented with both malate and serine but not acetate. Strain PER-K23 cultures were able to  
249 deplete 1 mM TCE after three 1% transfers (**Figure S1B**). We then examined long-term growth  
250 of strain PER-K23 cultures. The cultures readily depleted three feedings of 1 mM TCE (**Figure**  
251 **4A**). qPCR analysis revealed that *Dhb* cell density in the cultures increased by 100-fold after the  
252 consumption of 3 mM TCE (~2 x 10<sup>7</sup> cells ml<sup>-1</sup>) (**Figure 4A**). The cell growth parameter (6.3 ±  
253 0.02 x 10<sup>12</sup> cells mol<sup>-1</sup> Cl<sup>-</sup> released) is in good agreement to that of strains CF and UNSWDHB

254 reported previously (Grostern *et al.*, 2010, Wong *et al.*, 2016). However, after the fourth feeding,  
255 the cultures displayed a significant drop in dechlorination rate. Before each feed, cultures were  
256 purged with N<sub>2</sub>/CO<sub>2</sub> to remove cis-dichloroethene, to adjust the pH, and to replenish the medium  
257 with H<sub>2</sub>. Moreover, the metabolite profile of culture supernatants revealed that most malate and  
258 serine (~90%) were not consumed (**Figure 4B**). Thus the lagging dechlorination is not due to  
259 either the shortage of electron donor/carbon sources, accumulation of electron acceptor, or acidic  
260 pH. Unexpectedly, the metabolite profile of strain PER-K23 culture supernatants revealed  
261 pyruvate production in parallel to malate/serine consumption, which can be produced via the  
262 function of MAE, serine deaminase (SdaA; EC 4.3.1.17), or pyruvate:ferredoxin oxidoreductase,  
263 expressed in all *Dhb* proteomes (**Figure 3A; Table S1**). This unexpected pyruvate export  
264 suggests an unfavourable sink for pyruvate in *Dhb*. Indeed, the lack of malate dehydrogenase and  
265 succinate dehydrogenase/fumarate reductase genes prevents *Dhb* to ferment pyruvate to  
266 succinate, and the absence of the classical serine pathway prevents pyruvate to enter the Wood–  
267 Ljungdahl pathway via serine (**Figure 3A**). Furthermore, from a thermodynamics perspective,  
268 MAE-mediated malate decarboxylation is unfavorable under standard conditions (**Table 1**).  
269 Therefore, pyruvate (reaction product) must be exported to drive the malate-dependent NADPH  
270 regeneration.

### 271 **Deconstructing *Dhb* metabolism using complementary FBA and experimental validation**

272 We then simulated *Dhb* metabolism using the model constrained by experimental values  
273 for cell growth and substrate consumption (H<sub>2</sub>, TCE, malate, and serine) in strain PER-K23  
274 cultures at Day 20 (**Figure 4B**). In addition to pyruvate, the resulting model also predicted  
275 significant CO export (**Figure S2A**). Since we purged the cultures before each feed, CO would  
276 not accumulate to cause cell toxicity. Instead, CO production via ferredoxin-dependent CO

277 dehydrogenase (CooS; EC 1.2.7.4) indicates excessive reduced ferredoxin ( $\text{FRD}_{\text{red}}$ ) accumulation  
278 (**Figure 3A**). Given that *Dhb* grows under conditions with excessive  $\text{H}_2$ , the model predicted  
279 excessive  $\text{FRD}_{\text{red}}$  production from the FRD-reducing hydrogenases (Ech and HymABC)  
280 expressed in all available *Dhb* proteomes (**Tables S1, S2**).  $\text{FRD}_{\text{red}}$  accumulation will inhibit  
281 conversion of pyruvate to acetyl-CoA in central carbon metabolism while enhancing the reverse  
282 reaction (**Figure 3A**). Since acetyl-CoA is the substrate for citrate synthase in the oxidative TCA  
283 cycle, acetyl-CoA shortage would disable citrate synthesis, preventing pyruvate from entering  
284 the TCA cycle for amino acid biosynthesis. Therefore, the model predicted CO export to  
285 consume excessive  $\text{FRD}_{\text{red}}$ , enabling acetyl-CoA synthesis via pyruvate. Accordingly, acetate  
286 supplementation to strain PER-K23 cultures would replenish the acetyl-CoA pool in *Dhb* and  
287 ameliorate the imbalanced redox potential. Consistently, acetate supplementation (1 mM) at Day  
288 35 restored the lagging dechlorination, and strain PER-K23 cultures were able to deplete the  
289 remaining TCE and a subsequent feeding in 10 days (**Figure 4A**), along with a significant  
290 pyruvate production (0.3 mM) in parallel to the consumption of acetate (0.15 mM), malate (0.25  
291 mM) and serine (0.1 mM). In the first three feeding cycles, strain PER-K23 cells likely used the  
292 residual acetate in the medium components ( $\leq 0.1$  mM based on HPLC analysis) to synthesize  
293 acetyl-CoA. Therefore, the limited sink for pyruvate and excessive  $\text{FRD}_{\text{red}}$  production in *Dhb*  
294 resulted in pyruvate export.

295 After resolving FRD metabolism in *Dhb*, we further constrained the model with  
296 experimental values of strain PER-K23 cultures at Day 45, including the pyruvate export (**Figure**  
297 **4B**). However, the resulting model revealed excessive NADPH production from the consumed  
298 malate (0.25 mM) via the MAE reaction, unless the model allowed (a) export of citrate in the  
299 oxidative TCA cycle to prevent NADPH production via isocitrate dehydrogenase (**Figure 3A**) or

300 (b) export of amino acids to consume NADPH (e.g. glutamate, valine, leucine, proline) (**Figure**  
301 **S2B**). Congruently, metabolite profiling of the culture supernatants at Day 45 revealed apparent  
302 production of glutamate (33  $\mu\text{M}$ ), valine (18  $\mu\text{M}$ ), and iso/leucine (20  $\mu\text{M}$ ) against the killed  
303 control (**Figure 3B**), and these amino acids were not detected ( $< 0.1 \mu\text{M}$ ) in the culture  
304 supernatants of *E. coli* cultures cultivated on the defined medium at the same cell density ( $4 \times$   
305  $10^7$  cells  $\text{ml}^{-1}$ ). Thus, *Dhb* appears to export amino acids to consume excessive NADPH when a  
306 NADPH-regenerating source like malate is abundant in the growth medium. Additionally, some  
307 alanine and aspartate were also detected in the culture supernatants. Since these two amino acids  
308 are downstream derivatives of pyruvate (**Figure 2A**), *Dhb* likely exports them to prevent  
309 excessive NADPH production by isocitrate dehydrogenase (**Figure 3A**). However, citrate was  
310 not detected in the culture supernatants ( $<0.1 \mu\text{M}$ ). Altogether, our data suggested that both  
311 acetate and malate are required to sustain the minimal growth of *Dhb*, and serine  
312 supplementation can reduce the NADPH requirements in *Dhb* anabolism.

313 In this study, our integrated approaches have resolved the metabolic dependency of *Dhb*,  
314 which brings previously identified arginine and threonine requirements of strain PER-K23  
315 cultures into context (Holliger *et al.*, 1998). Due to the lack of SerB, *Dhb* utilizes threonine to  
316 synthesize serine and its derived amino acids. Also, due to the restricted NADPH regeneration  
317 system, arginine is degraded to malate via fumarate for NADPH regeneration (**Figure 3A**)  
318 (Cunin *et al.*, 1986). By contrast, when malate is available, *Dhb* becomes an amino acid producer,  
319 exporting amino acids to consume excessive NADPH (**Figure 3B**), along with the  
320 decarboxylated product, pyruvate (**Figure 4B**). This finding has explained the common co-  
321 occurrence of the amino acid- and pyruvate-fermenting *Sedimentibacter* spp. in *Dhb*-enriched  
322 consortia (Imachi *et al.*, 2016, Maphosa *et al.*, 2012, Tang *et al.*, 2012, Yoshida *et al.*, 2009).

323 However, amino acid export also limits *Dhb*'s biomass generation, resulting in the unusual low  
324 cell growth (**Figure 4A**). Compared to *Dhb*, other OHRB possess a more flexible system in  
325 NADPH regeneration (**Figure 1**). For example, the classical serine biosynthesis pathway is  
326 present in *Dehalococcoides* based on a <sup>13</sup>C incorporation experiment, and an incomplete Wood–  
327 Ljungdahl pathway can support NADPH regeneration (**Figure 3A**) (Zhuang *et al.*, 2014).  
328 *Geobacter lovleyi*, while lacking SerB, possesses a functional TCA cycle to respire acetate and  
329 generate sufficient NADPH using isocitrate dehydrogenase (**Figure 3A**) (Galushko and Schink,  
330 2000, Sung *et al.*, 2006). Finally, *Desulfitobacterium hafniense*, in contrast to its close relative  
331 *Dhb*, retains malate dehydrogenase and fumarate reductase genes in the TCA cycle, allowing  
332 pyruvate fermentation to malate for NADPH regeneration via MAE (**Figure 3A**) (Peng *et al.*,  
333 2012).

#### 334 **Metabolic interdependencies in the *Dhb*-enriched consortium**

335 After characterizing *Dhb*'s metabolic dependency, we wondered if these nutrients are  
336 available in *Dhb*-enriched microbial communities. Acetate is the final product of acetogenic and  
337 fermenting bacteria that often co-exist in organohalide-respiring consortia (Heimann *et al.*, 2006),  
338 while the presence of malate or serine has not been reported before. Therefore, we analyzed the  
339 metabolites in supernatants of the strain CF-enriched consortium ACT-3. After lactate and  
340 chloroform were fed, time-course metabolite profile revealed malate accumulation (~0.5 μM) in  
341 the ACT-3 supernatants along with chloroform dechlorination to dichloromethane (**Figure S3**).  
342 The spiked malate concentration lasted until the fed lactate was depleted, with malate not being  
343 detected in the 1 M lactate stock based on LC-MS analysis (< 50 nM). Therefore, malate is a  
344 natural substrate for *Dhb* in ACT-3. The detection of malate production in ACT-3 brings the  
345 present malate permease gene in *Dhb* genomes and the consistent MAE expression in all *Dhb*



346 strains into context. Also, finding available malate in ACT-3 suggests that *Dhb* has sufficient  
347 NADPH to drive a more NADPH-consuming pathway (SerB-independent pathway) for amino  
348 acid synthesis (the embedded table in **Figure 3B**). However, in contrast to strain PER-K23  
349 cultures, no amino acid was detected ( $<0.1 \mu\text{M}$ ) in ACT-3 supernatants. Trace pyruvate is  
350 present, but the concentration remained unchanged throughout dechlorination (**Figure S3**). These  
351 data suggested that other microbial populations consume the amino acids and pyruvate exported  
352 by *Dhb*.

353 We then managed to identify the malate producer in ACT-3. Based on 16S rRNA pyrotag  
354 sequences (accession SRX181448), *Bac* is a dominant population in the ACT-3 (Grostern and  
355 Edwards, 2006, Grostern *et al.*, 2010, Tang *et al.*, 2012). Congruently, fermentative  
356 malate/fumarate production by *Bacteroides* spp. has been studied extensively (Chen and Wolin,  
357 1981, Macy *et al.*, 1975, Macy *et al.*, 1978, Miller, 1978). Due to the lack of the heme  
358 biosynthesis pathway, *Bacteroides* spp. only ferments glucose to acetate,  $\text{H}_2$ , and  
359 malate/fumarate via lactate (Chen and Wolin, 1981), unless exogenous heme is present to  
360 support further malate fermentation to succinate (**Figure 5A**). Consistently, the closed genome of  
361 *Bac* (accession CP006772) reveals complete pathways for lactate fermentation to acetate and  
362 succinate (Tang and Edwards, 2013b), and multiple genes for  $\text{H}_2$ -producing hydrogenases (Hyf;  
363 EC 1.12.1.4) (Trchounian and Trchounian, 2013), but lacks most genes for heme biosynthesis.  
364 Moreover, citrate synthase, aconitase, and isocitrate dehydrogenase genes in the TCA cycle are  
365 missing from the *Bac* genome (**Figure 5B**), disrupting glutamate biosynthesis. Therefore, these  
366 data, along with the specific malate requirement and unexpected glutamate export observed in  
367 strain PER-K23 cultures, portend a tightly entangled syntrophy between malate-consuming,  
368 glutamate-producing *Dhb* and the malate-producing, glutamate-auxotrophic *Bac*.

369 Based on literature and integrated multi-omics data, we proposed a metabolic  
370 interdependency between strain CF and *Bac* (**Figure 5A**). Given that (a) fermentative malate  
371 production from lactate is thermodynamically unfavorable under standard conditions (**Table 1**)  
372 and (b) heme is insoluble and never added to the growth medium, lactate is mainly fermented to  
373 H<sub>2</sub>, acetate and CO<sub>2</sub> by *Bac*. Nevertheless, fermentative malate production from lactate would  
374 become thermodynamically favorable when (a) the H<sub>2</sub> production is coupled to organohalide  
375 respiration by *Dhb* (**Table 1**) and (b) an efficient consumer is present to lower malate  
376 concentration. Therefore, *Bac* exports malate to consume excessive NADH generated from  
377 lactate and to facilitate NADPH regeneration in *Dhb*. In return, *Dhb* exports glutamate and other  
378 amino acids to consume excessive NADPH and to facilitate *Bac* anabolism. Since pyruvate was  
379 not accumulated in ACT-3 (**Figure S3**), the exported pyruvate from *Dhb* is likely recycled by  
380 other community members, including *Bac*, which shapes an intercellular metabolic cycle,  
381 enabling *Dhb* and *Bac* to indirectly trade NADH/NADPH across the membrane, resembling the  
382 function of a transhydrogenase (**Table 1**) (Voordouw *et al.*, 1983).

### 383 **Decoupling interspecies malate-pyruvate exchange**

384 We sought to validate the proposed malate-pyruvate exchange between *Dhb* and *Bac*.  
385 Given that *Bac* ferments lactate to malate as a result of heme-auxotrophy, heme addition to ACT-  
386 3 would enable further malate fermentation to succinate, disrupting the malate-pyruvate  
387 exchange and reducing available electron donors (i.e. H<sub>2</sub>) for strain CF (**Figure 5A**). Therefore,  
388 we monitored the effect of heme addition to ACT-3 sub-transfer cultures under limiting electron  
389 donor conditions (1-fold theoretical electron equivalent). After 12 days of incubation, chloroform  
390 dechlorination (50 μM) only occurred in ACT-3 sub-transfer cultures without heme addition  
391 (Heme (-) cultures) but not in cultures supplemented with 1 mg L<sup>-1</sup> heme (Heme (+) cultures)

392 **(Figure 5C)**. Moreover, malate and pyruvate were only detected in supernatants of Heme (-)  
393 cultures but not in supernatants of Heme (+) cultures at Day 12 **(Figure 5D)**. By contrast, Heme  
394 (+) culture supplemented with malate (0.25 mM) revealed significant chloroform dechlorination  
395 (0.2 mM). These data indicate that dechlorination in Heme (+) cultures is limited by the shortage  
396 of electron donors and malate. Consistently, when we provided excessive electron donors (3-fold  
397 theoretical electron equivalent) to the cultures at Day 12, all three cultures depleted chloroform  
398 within 6 days. Finally, since fumarate reduction to succinate in *Bac* is coupled to proton motive  
399 force, heme supplementation will enable *Bac* to synthesize more ATP via efficient oxidative  
400 phosphorylation rather than via substrate-level phosphorylation (Macy *et al.*, 1975, Madej *et al.*,  
401 2006) **(Table 1)**, thereby reaching a higher cell density. Consistently, the relative abundance of  
402 *Bac* in Heme (+) cultures at Day 18 is 10 times higher than that in Heme (-) cultures **(Figure 5E)**.  
403 Therefore, our data support the occurrence of malate-pyruvate exchange between *Bac* and strain  
404 CF.

### 405 **Implications for microbial ecology**

406 In this study, the proposed malate-pyruvate exchange between *Bac* and *Dhb* resembles  
407 the mitochondrial malate-pyruvate shuttle in eukaryotic cells (Liu *et al.*, 2002, MacDonald,  
408 1995). In the malate-pyruvate shuttle, cytoplasmic pyruvate is first transported to mitochondria,  
409 and is reduced to malate via NADH-dependent malate dehydrogenase in the TCA cycle **(Figure**  
410 **3A)**. Malate is then exported to cytoplasm via an antiporter, and decarboxylated to pyruvate by  
411 MAE for NADPH regeneration. Although the pairing of metabolic partners in nature can be  
412 random, the complementary gaps in the TCA cycle and malate metabolism between *Dhb* and  
413 *Bac* genomes **(Figure 5B)** are likely a consequence of genome streamlining driven by co-  
414 adaptation. This claim is supported by the presence of malate dehydrogenase and succinate

415 dehydrogenase/fumarate reductase genes in most *Peptococcaceae* but not in *Dhb* (dashed boxes  
416 in **Figure 1**). Also, the oxidative TCA cycle is present in the genomes of all available  
417 *Bacteroides* isolates but not in *Bac*. Accordingly, this study has found a relevant example in  
418 biology, the interspecies malate-pyruvate shuttle, to support an endosymbiotic hypothesis in  
419 which mitochondria originated from a mutualistic interaction mediated by organic acid exchange  
420 (Searcy, 2003). In conclusion, the data present in this study demonstrate that metabolic  
421 complementarity and redox constraints (i.e. NADPH regeneration) are important driving forces  
422 for amino acid exchange in anaerobic microbial communities. Furthermore, the successful model  
423 prediction justified our previous argument that the accuracy of metabolic annotation can be  
424 greatly improved through consideration of cofactor availability and enzyme promiscuity. Finally,  
425 finding *Dhb* as an amino acid producer in the parent consortium reinforces the caveat that  
426 observed physiology of isolate cultures can deviate from their physiology in natural niches.  
427 Therefore, integration of laboratory experiments with computational metabolic modeling offers  
428 great opportunities to decipher the metabolic interdependency of fastidious, or currently  
429 unculturable, microorganisms.

430 **Acknowledgements** Support was provided by the Government of Ontario through Genome  
431 Ontario SPARK Research Grant. We also acknowledge the BioZone Mass Spectrometry facility  
432 for UPLC-ESI-HRMS analyses. We are grateful to the gift of active *Dehalobacter restrictus*  
433 strain PER-K23 culture from Dr. Jun Yan at the Löffler Lab in University of Tennessee  
434 (Knoxville, USA).

435 **Author contributions** E.A.E, R.M, and P.H.W conceptualized this study. C.H. and K.C. re-  
436 constructed the *Dehalobacter* model. K.C. performed the Flux Balance Analysis. P.H.W.  
437 performed the experiments. K.N. performed the organic acid analysis. R.F. performed the LC-

438 MS analysis. P.H.W. and N.V. proposed the mechanism of interspecies malate-pyruvate shuttle.  
439 E.A.E, R.M, and P.H.W wrote this paper with helps from all the authors. All the authors were  
440 participated in data analysis and discussion.

441

442 Supplementary information is available at ISMEJ's website

443

## 444 **References**

445 Adrian L, Loeffler FE (2016). *Organohalide-respiring bacteria*, vol. 85. Springer.

446

447 Amador-Noguez D, Feng X-J, Fan J, Roquet N, Rabitz H, Rabinowitz JD (2010). Systems-level  
448 metabolic flux profiling elucidates a complete, bifurcated tricarboxylic acid cycle in *Clostridium*  
449 *acetobutylicum*. *J Bacteriol* **192**: 4452-4461.

450

451 Cardona C, Weisenhorn P, Henry C, Gilbert JA (2016). Network-based metabolic analysis and microbial  
452 community modeling. *Curr Opin Microbiol* **31**: 124-131.

453

454 Casadesús J, Low D (2006). Epigenetic gene regulation in the bacterial world. *Microbiol Mol Biol Rev* **70**:  
455 830-856.

456

457 Chen M, Wolin MJ (1981). Influence of heme and vitamin B<sub>12</sub> on growth and fermentations of  
458 *Bacteroides* species. *J Bacteriol* **145**: 466-471.

459

460 Chen Y-L, Fu H-Y, Lee T-H, Shih C-J, Huang L, Wang Y-S *et al* (2018). Identification of estrogen  
461 degradation pathway and estrogen degraders in an activated sludge. *Appl Environ Microbiol*: AEM.  
462 00001-00018.

463

464 Correia K, Ho H, Mahadevan R (2018). Genome-scale metabolic network reconstruction of the  
465 chloroform-respiring *Dehalobacter restrictus* strain CF. *bioRxiv*.

466

467 Cunin R, Glansdorff N, Pierard A, Stalon V (1986). Biosynthesis and metabolism of arginine in bacteria.  
468 *Microbiol Rev* **50**: 314.

469

470 Dauner M, Sauer U (2001). Stoichiometric growth model for riboflavin-producing *Bacillus subtilis*.  
471 *Biotechnol Bioeng* **76**: 132-143.

472

473 Dolfing J (2013). Syntrophy in microbial fuel cells. *ISME J* **8**: 4.

474  
475 Duhamel M, Edwards EA (2007). Growth and yields of dechlorinators, acetogens, and methanogens  
476 during reductive dechlorination of chlorinated ethenes and dihaloelimination of 1,2-dichloroethane.  
477 *Environ Sci Technol* **41**: 2303-2310.

478  
479 Ebrahim A, Lerman JA, Palsson BO, Hyduke DR (2013). COBRApy: constraints-based reconstruction  
480 and analysis for python. *BMC Syst Biol* **7**: 74.

481  
482 Embree M, Liu JK, Al-Bassam MM, Zengler K (2015). Networks of energetic and metabolic interactions  
483 define dynamics in microbial communities. *Proceedings of the National Academy of Sciences* **112**:  
484 15450-15455.

485  
486 Fan J, Ye J, Kamphorst JJ, Shlomi T, Thompson CB, Rabinowitz JD (2014). Quantitative flux analysis  
487 reveals folate-dependent NADPH production. *Nature* **510**: 298.

488  
489 Fischer S, Brunk BP, Chen F, Gao X, Harb OS, Iodice JB *et al* (2011). Using OrthoMCL to assign  
490 proteins to OrthoMCL-DB groups or to cluster proteomes into new ortholog groups. *Current Protocols*  
491 *in Bioinformatics*: 6.12. 11-16.12. 19.

492  
493 Galushko AS, Schink B (2000). Oxidation of acetate through reactions of the citric acid cycle by  
494 *Geobacter sulfurreducens* in pure culture and in syntrophic coculture. *Arch Microbiol* **174**: 314-321.

495  
496 Greenberg DM, Ichihara A (1957). Further studies on the pathway of serine formation from carbohydrate.  
497 *J Biol Chem* **224**: 331-340.

498  
499 Grostern A, Edwards EA (2006). A 1,1,1-trichloroethane-degrading anaerobic mixed microbial culture  
500 enhances biotransformation of mixtures of chlorinated ethenes and ethanes. *Appl Environ Microbiol* **72**:  
501 7849-7856.

502  
503 Grostern A, Duhamel M, Dworatzek S, Edwards EA (2010). Chloroform respiration to dichloromethane  
504 by a *Dehalobacter* population. *Environ Microbiol* **12**: 1053-1060.

505  
506 Grundy FJ, Henkin TM (2002). Synthesis of serine, glycine, cysteine, and methionine. *Bacillus subtilis*  
507 *and its closest relatives*. American Society of Microbiology. pp 245-254.

508  
509 Guindon S, Dufayard J-F, Lefort V, Anisimova M, Hordijk W, Gascuel O (2010). New algorithms and  
510 methods to estimate maximum-likelihood phylogenies: assessing the performance of PhyML 3.0. *Syst*  
511 *Biol* **59**: 307-321.

512  
513 He Z, Zhang H, Gao S, Lercher MJ, Chen W-H, Hu S (2016). Evolview v2: an online visualization and  
514 management tool for customized and annotated phylogenetic trees. *Nucleic Acids Res* **44**: W236-W241.

515

- 516 Heimann AC, Batstone DJ, Jakobsen R (2006). *Methanosarcina* spp. drive vinyl chloride dechlorination  
517 via interspecies hydrogen transfer. *Appl Environ Microbiol* **72**: 2942-2949.
- 518  
519 Holliger C, Schraa G, Stams A, Zehnder A (1993). A highly purified enrichment culture couples the  
520 reductive dechlorination of tetrachloroethene to growth. *Appl Environ Microbiol* **59**: 2991-2997.
- 521  
522 Holliger C, Hahn D, Harmsen H, Ludwig W, Schumacher W, Tindall B *et al* (1998). *Dehalobacter*  
523 *restrictus* gen. nov. and sp. nov., a strictly anaerobic bacterium that reductively dechlorinates tetra- and  
524 trichloroethene in an anaerobic respiration. *Arch Microbiol* **169**: 313-321.
- 525  
526 Hug LA, Baker BJ, Anantharaman K, Brown CT, Probst AJ, Castelle CJ *et al* (2016). A new view of the  
527 tree of life. *Nature microbiology* **1**: 16048.
- 528  
529 Imachi H, Sakai S, Kubota T, Miyazaki M, Saito Y, Takai K (2016). *Sedimentibacter acidaminivorans* sp.  
530 nov., an anaerobic, amino-acid-utilizing bacterium isolated from marine subsurface sediment. *Int J Syst*  
531 *Evol Microbiol* **66**: 1293-1300.
- 532  
533 Jugder BE, Ertan H, Wong YK, Braidy N, Manefield M, Marquis CP *et al* (2016). Genomic,  
534 transcriptomic and proteomic analyses of *Dehalobacter* UNSWDHB in response to chloroform. *Environ*  
535 *Microbiol Rep* **8**: 814-824.
- 536  
537 Justicia-Leon SD, Ritalahti KM, Mack EE, Löffler FE (2012). Dichloromethane fermentation by a  
538 *Dehalobacter* sp. in an enrichment culture derived from pristine river sediment. *Appl Environ Microbiol*  
539 **78**: 1288-1291.
- 540  
541 Kuznetsova E, Proudfoot M, Gonzalez CF, Brown G, Omelchenko MV, Borozan I *et al* (2006). Genome-  
542 wide analysis of substrate specificities of the *Escherichia coli* haloacid dehalogenase-like phosphatase  
543 family. *J Biol Chem* **281**: 36149-36161.
- 544  
545 Lam H, Winkler ME (1990). Metabolic relationships between pyridoxine (vitamin B<sub>6</sub>) and serine  
546 biosynthesis in *Escherichia coli* K-12. *J Bacteriol* **172**: 6518-6528.
- 547  
548 Liu YQ, Jetton TL, Leahy JL (2002).  $\beta$ -Cell adaptation to insulin resistance increased pyruvate  
549 carboxylase and malate-pyruvate shuttle activity in islets of nondiabetic Zucker fatty rats. *J Biol Chem* **277**:  
550 39163-39168.
- 551  
552 MacDonald MJ (1995). Feasibility of a mitochondrial pyruvate malate shuttle in pancreatic islets further  
553 implication of cytosolic NADPH in insulin secretion. *J Biol Chem* **270**: 20051-20058.
- 554  
555 Macy J, Probst I, Gottschalk G (1975). Evidence for cytochrome involvement in fumarate reduction and  
556 adenosine 5'-triphosphate synthesis by *Bacteroides fragilis* grown in the presence of hemin. *J Bacteriol*  
557 **123**: 436-442.
- 558



- 559 Macy JM, Ljungdahl LG, Gottschalk G (1978). Pathway of succinate and propionate formation in  
560 *Bacteroides fragilis*. *J Bacteriol* **134**: 84-91.
- 561
- 562 Madej MG, Nasiri HR, Hilgendorff NS, Schwalbe H, Uden G, Lancaster CRD (2006). Experimental  
563 evidence for proton motive force-dependent catalysis by the diheme-containing succinate: menaquinone  
564 oxidoreductase from the Gram-positive bacterium *Bacillus licheniformis*. *Biochem* **45**: 15049-15055.
- 565
- 566 Magnúsdóttir S, Thiele I (2018). Modeling metabolism of the human gut microbiome. *Curr Opin*  
567 *Biotechnol* **51**: 90-96.
- 568
- 569 Manor O, Levy R, Borenstein E (2014). Mapping the inner workings of the microbiome: genomic- and  
570 metagenomic-based study of metabolism and metabolic interactions in the human microbiome. *Cell*  
571 *Metab* **20**: 742-752.
- 572
- 573 Maphosa F, van Passel MW, de Vos WM, Smidt H (2012). Metagenome analysis reveals yet unexplored  
574 reductive dechlorinating potential of *Dehalobacter* sp. E1 growing in co-culture with *Sedimentibacter* sp.  
575 *Environ Microbiol Rep* **4**: 604-616.
- 576
- 577 McCutcheon JP, Moran NA (2012). Extreme genome reduction in symbiotic bacteria. *Nat Rev Microbiol*  
578 **10**: 13.
- 579
- 580 McInerney MJ, Sieber JR, Gunsalus RP (2009). Syntrophy in anaerobic global carbon cycles. *Curr Opin*  
581 *Biotechnol* **20**: 623-632.
- 582
- 583 Mee MT, Collins JJ, Church GM, Wang HH (2014). Syntrophic exchange in synthetic microbial  
584 communities. *P Natl Acad Sci* **111**: E2149-E2156.
- 585
- 586 Miller T (1978). The pathway of formation of acetate and succinate from pyruvate by *Bacteroides*  
587 *succinogenes*. *Arch Microbiol* **117**: 145-152.
- 588
- 589 Mori M, Ponce-de-León M, Peretó J, Montero F (2016). Metabolic complementation in bacterial  
590 communities: necessary conditions and optimality. *Front Microbiol* **7**.
- 591
- 592 Peng X, Yamamoto S, Vertès AA, Keresztes G, Inatomi K-i, Inui M *et al* (2012). Global transcriptome  
593 analysis of the tetrachloroethene-dechlorinating bacterium *Desulfitobacterium hafniense* Y51 in the  
594 presence of various electron donors and terminal electron acceptors. *J Ind Microbiol Biotechnol* **39**: 255-  
595 268.
- 596
- 597 Puentes Jácome LA, Edwards EA (2017). A switch of chlorinated substrate causes emergence of a  
598 previously undetected native *Dehalobacter* population in an established *Dehalococcoides*-dominated  
599 chloroethene-dechlorinating enrichment culture. *FEMS Microbiol Ecol* **93**: fix141.
- 600



- 601 Roling WF, van Bodegom PM (2014). Toward quantitative understanding on microbial community  
602 structure and functioning: a modeling-centered approach using degradation of marine oil spills as  
603 example. *Front Microbiol* **5**: 125.
- 604  
605 Rupakula A, Kruse T, Boeren S, Holliger C, Smidt H, Maillard J (2013). The restricted metabolism of the  
606 obligate organohalide respiring bacterium *Dehalobacter restrictus*: lessons from tiered functional  
607 genomics. *Philos Trans R Soc Lond B Biol Sci* **368**: 20120325.
- 608  
609 Rupakula A, Lu Y, Kruse T, Boeren S, Holliger C, Smidt H *et al* (2015). Functional genomics of  
610 corrinoid starvation in the organohalide-respiring bacterium *Dehalobacter restrictus* strain PER-K23.  
611 *Front Microbiol* doi:103389/fmicb201400751: 751.
- 612  
613 Searcy DG (2003). Metabolic integration during the evolutionary origin of mitochondria. *Cell Res* **13**:  
614 229.
- 615  
616 Seth EC, Taga ME (2014). Nutrient cross-feeding in the microbial world. *Front microbiol* **5**: 350.
- 617  
618 Sieber JR, McInerney MJ, Gunsalus RP (2012). Genomic insights into syntrophy: the paradigm for  
619 anaerobic metabolic cooperation. *Annu Rev Microbiol* **66**: 429-452.
- 620  
621 Sung Y, Fletcher KE, Ritalahti KM, Apkarian RP, Ramos-Hernandez N, Sanford RA *et al* (2006).  
622 *Geobacter lovleyi* sp. nov. strain SZ, a novel metal-reducing and tetrachloroethene-dechlorinating  
623 bacterium. *Appl Environ Microbiol* **72**: 2775-2782.
- 624  
625 Suthers PF, Zomorodi A, Maranas CD (2009). Genome-scale gene/reaction essentiality and synthetic  
626 lethality analysis. *Mol Syst Biol* **5**: 301.
- 627  
628 Talavera G, Castresana J (2007). Improvement of phylogenies after removing divergent and ambiguously  
629 aligned blocks from protein sequence alignments. *Syst Biol* **56**: 564-577.
- 630  
631 Tan J, Zuniga C, Zengler K (2015). Unraveling interactions in microbial communities - from co-cultures  
632 to microbiomes. *J Microbiol* **53**: 295-305.
- 633  
634 Tang S, Gong Y, Edwards EA (2012). Semi-automatic in silico gap closure enabled de novo assembly of  
635 two *dehalobacter* genomes from metagenomic data. *PLoS One* **7**: e52038.
- 636  
637 Tang S, Edwards EA (2013a). Identification of *Dehalobacter* reductive dehalogenases that catalyze  
638 dechlorination of chloroform, 1,1,1-trichloroethane and 1,1-dichloroethane. *Philos Trans R Soc Lond B*  
639 *Biol Sci* **368**: 20120318.
- 640  
641 Tang S, Edwards EA (2013b). Complete genome sequence of *Bacteroidales* strain CF from a chloroform-  
642 dechlorinating enrichment culture. *Genome Announc* **1**: e01066-01013.
- 643

644 Tang S, Wang PH, Higgins S, Löffler F, Edwards EA (2016). Sister *Dehalobacter* genomes reveal  
645 specialization in organohalide respiration and recent strain differentiation likely driven by chlorinated  
646 substrates. *Front Microbiol* doi:103389/fmicb201600100.

647  
648 Tedeschi PM, Markert EK, Gounder M, Lin H, Dvorzhinski D, Dolfi S *et al* (2013). Contribution of  
649 serine, folate and glycine metabolism to the ATP, NADPH and purine requirements of cancer cells. *Cell*  
650 *Death Dis* **4**: e877.

651  
652 Trchounian K, Trchounian A (2013). *Escherichia coli* hydrogenase 4 (hyf) and hydrogenase 2 (hyb)  
653 contribution in H<sub>2</sub> production during mixed carbon (glucose and glycerol) fermentation at pH 7.5 and pH  
654 5.5. *Int J Hydrogen Energy* **38**: 3921-3929.

655  
656 van Doesburg W, van Eekert MH, Middeldorp PJ, Balk M, Schraa G, Stams AJ (2005). Reductive  
657 dechlorination of beta-hexachlorocyclohexane (beta-HCH) by a *Dehalobacter* species in coculture with a  
658 *Sedimentibacter* sp. *FEMS Microbiol Ecol* **54**: 87-95.

659  
660 Voordouw G, Vies SM, Themmen AP (1983). Why are two different types of pyridine nucleotide  
661 transhydrogenase found in living organisms? *FEBS J* **131**: 527-533.

662  
663 Wade W (2002). Unculturable bacteria—the uncharacterized organisms that cause oral infections. *J R Soc*  
664 *Med* **95**: 81-83.

665  
666 Wang PH, Tang S, Nemr K, Flick R, Yan J, Mahadevan R *et al* (2016). Refined experimental annotation  
667 reveals conserved corrinoid autotrophy in chloroform-respiring *Dehalobacter* isolates. *ISME J* **11**: 626-  
668 640.

669  
670 Wang S, Zhang W, Yang KL, He J (2014). Isolation and characterization of a novel *Dehalobacter* species  
671 strain TCP1 that reductively dechlorinates 2,4,6-trichlorophenol. *Biodegradation* **25**: 313-323.

672  
673 Wintermute EH, Silver PA (2010). Emergent cooperation in microbial metabolism. *Mol Syst Biol* **6**: 407-  
674 407.

675  
676 Wong YK, Holland SI, Ertan H, Manefield M, Lee M (2016). Isolation and characterization of  
677 *Dehalobacter* sp. strain UNSWDHB capable of chloroform and chlorinated ethane respiration. *Environ*  
678 *Microbiol* doi: 101111/1462-292013287.

679  
680 Yoshida N, Ye L, Baba D, Katayama A (2009). A novel *Dehalobacter* species is involved in extensive  
681 4,5,6,7-tetrachlorophthalide dechlorination. *Appl Environ Microbiol* **75**: 2400-2405.

682  
683 Zdobnov EM, Tegenfeldt F, Kuznetsov D, Waterhouse RM, Simao FA, Ioannidis P *et al* (2016).  
684 OrthoDB v9. 1: cataloging evolutionary and functional annotations for animal, fungal, plant, archaeal,  
685 bacterial and viral orthologs. *Nucleic Acids Res* **45**: D744-D749.

686

687 Zhao M, Xue K, Wang F, Liu S, Bai S, Sun B *et al* (2014). Microbial mediation of biogeochemical cycles  
688 revealed by simulation of global changes with soil transplant and cropping. *ISME J* **8**: 2045-2055.

689  
690 Zhuang K, Izallalen M, Mouser P, Richter H, Risso C, Mahadevan R *et al* (2011). Genome-scale dynamic  
691 modeling of the competition between *Rhodoferrax* and *Geobacter* in anoxic subsurface environments.  
692 *ISME J* **5**: 305.

693  
694 Zhuang W-Q, Yi S, Bill M, Brisson VL, Feng X, Men Y *et al* (2014). Incomplete Wood–Ljungdahl  
695 pathway facilitates one-carbon metabolism in organohalide-respiring *Dehalococcoides mccartyi*.  
696 *Proceedings of the National Academy of Sciences* **111**: 6419-6424.

697

698

699

700

## 701 **Figure legends**

702

703 **Figure 1. Presence/Absence of enzyme orthologs in the TCA cycle, NADPH regeneration,**  
704 **and serine biosynthesis mapped to a species tree of organohalide-respiring bacteria and**  
705 **selected organisms.** Open circles represent the enzyme activity are present in the corresponding  
706 organisms based on experimental evidences but without annotated enzyme orthologs; the dashed  
707 line boxes highlight the missing TCA cycle enzymes in *Dehalobacter* strains and *Bacteroides* sp.  
708 CF. Note that isocitrate dehydrogenase (Icd) in the TCA cycle is also involved in NADPH  
709 regeneration (orange star). Abbreviations: SDH, succinate dehydrogenase/fumarate reductase;  
710 Mdh, malate dehydrogenase, Cit, citrate synthase; Aco, aconitase; MAE, malic enzyme; MetF,  
711 5,10-methelene-tetrahydrofolate reductase/dehydrogenase; HndABCD (or HymABC), NADP<sup>+</sup>-  
712 reducing hydrogenase; NfnAB, NADP<sup>+</sup>:ferredoxin oxidoreductase; PntAB, membrane-bound  
713 transhydrogenase; SerA, 3-phosphoglycerate dehydrogenase; SerB, o-phosphoserine phosphatase;  
714 SerC, o-phosphoserine aminotransferase; Thrald, threonine aldolase; Shmt, serine  
715 hydroxymethyltransferase; PdxB, erythrose-4-phosphate dehydrogenase.

716 **Figure 2. Serine biosynthesis in *Dehalobacter restrictus* via threonine.** (A) Schematic of  
717 amino acid biosynthesis (alanine, aspartate, glutamate, and serine; in dashed boxes) and carbon  
718 incorporation in *Dehalobacter restrictus* (*Dhb*) using [3-<sup>13</sup>C]pyruvate as the precursor. Serine is  
719 synthesized via the salvage pathway in *Dhb* due to the lack of SerB (highlighted in orange), the  
720 enzyme catalyzing the final step in the classical serine biosynthesis pathway. The <sup>13</sup>C-labelled  
721 carbon originating from [3-<sup>13</sup>C]pyruvate is shown in red and the carbons derived from pyruvate  
722 is highlighted in cyan. (B) SerB activities in cell lysates of strain PER-K23 and *E. coli*,  
723 respectively. (-) control, cell-lysate-free control. Tetrachloroethene dehalogenase (PceA) activity  
724 was used as a quality control of strain PER-K23 cell lysates. Data are means ± SE of three  
725 replicates in each experiment as shown on figures. (C) Relative abundance of different mass  
726 isotopomers (M1/M0) of serine, aspartate, alanine, and glutamate obtained from strain PER-K23  
727 cells cultivated on the defined medium supplemented with unlabeled pyruvate or [3-<sup>13</sup>C]pyruvate.  
728 Abbreviations: AcCoA, acetyl-CoA; AKG, α-ketoglutarate; CH<sub>2</sub>=THF, 5,10-  
729 methylenetetrahydrofolate; MAL, OAA, oxaloacetate; SER-P<sub>i</sub>, o-phosphoserine; SerA,  
730 phosphoglycerate dehydrogenase; SerB, phosphoserine phosphatase; SerC, phosphoserine  
731 aminotransferase.

732 **Figure 3. Amino acid dependency of *Dehalobacter restrictus* results from restricted redox**  
733 **metabolism (NADPH and ferredoxin).** (A) Proposed central carbon metabolism and redox  
734 cofactor regeneration system in *Dehalobacter restrictus* (*Dhb*) with acetate and malate as the  
735 carbon sources. The name of enzymes and the missing cofactors (in square bracket) are shown in  
736 blue. The red crosses (X) represent the missing genes or missing cofactors in the *Dhb* genome.  
737 NAD(P)<sup>+</sup>/NAD(P)H are shown in red beside the corresponding metabolic reactions. The black  
738 arrows represent the metabolic reactions involved in NADPH and ferredoxin regeneration, while

739 grey arrows represent the reactions not involved. The double-headed arrows indicate reversible  
740 reactions, and the bigger arrowheads represent the direction of reactions under physiological  
741 conditions. **(B)** Amino acid profile in the supernatants of strain PER-K23 cultures after the  
742 consumption of 5 mM TCE (**Figure 4A**). The amounts of NADPH required to synthesize each  
743 amino acid via the classical pathway (SerB<sup>+</sup>) or salvage pathway (SerB<sup>-</sup>) are listed below. Data  
744 are means  $\pm$  SE of three replicates in each experiment as shown on figures. Abbreviations: AC,  
745 acetate; AC-CoA, acetyl-CoA; AKG,  $\alpha$ -ketoglutarate; CH<sub>2</sub>=THF, 5,10-  
746 methylenetetrahydrofolate; CH<sub>2</sub> $\equiv$ THF, 5,10-methenyltetrahydrofolate; CH<sub>3</sub>-THF, 5-  
747 methyltetrahydrofolate; CHO-THF, 5-formyl-tetrahydrofolate; CIT, citrate; FOR, formate; FUM,  
748 fumarate; FRD, ferredoxin; ICIT, isocitrate; MAL, malate; OAA, oxaloacetate; PYR, pyruvate;  
749 SER-P<sub>i</sub>, O-phosphoserine; SUC, succinate; SUC-CoA, succinyl-CoA; THF, tetrahydrofolate.  
750 Abbreviations for enzymes: CODH, carbon monoxide dehydrogenase; FDH, formate  
751 dehydrogenase; FUM/SDH, fumarate reductase/succinate dehydrogenase; MAE, malic enzyme;  
752 MTHFD, 5,10-methylenetetrahydrofolate dehydrogenase; MTHFR, 5,10-  
753 methylenetetrahydrofolate reductase; MDH, malate dehydrogenase; SerB, o-phosphoserine  
754 phosphatase; WL pathway, Wood–Ljungdahl pathway (or folate cycle).

755 **Figure 4. Growth assays of *Dehalobacter restrictus* strain PER-K23.** **(A)** Cumulative  
756 tetrachloroethene (TCE) dechlorination profile (blue circle) and cell growth (brown square) by  
757 the strain PER-K23 cultures cultivated on the defined medium amended with malate and serine.  
758 When the fed TCE is depleted (\*), the cultures were purged with 80% N<sub>2</sub>/CO<sub>2</sub> to remove  
759 dechlorination product cis-dichloroethene (cDCE) and re-fed with H<sub>2</sub> and TCE (1 mM). **(B)**  
760 Time-course metabolite profile (malate, circle; serine, square; pyruvate, triangle) of the culture  
761 supernatants. The black-colored plots represent the killed controls. The slightly gradual increase

762 in substrate concentration in the killed controls is due to water evaporation during culture  
763 purging. The cumulative TCE consumption is also shown. Data are means  $\pm$  SE of three  
764 replicates in each experiment as shown on figures.

765 **Figure 5. Proposed interspecies malate-pyruvate shuttle between *Dehalobacter restrictus***  
766 **and the syntrophic *Bacteroides* sp. (A)** Proposed syntrophy between *Dehalobacter restrictus*  
767 (*Dhb*) and the *Bacteroides* sp. (*Bac*) including syntrophic lactate fermentation/chloroform  
768 dechlorination and cross-feedings of malate, pyruvate, and amino acids. In the simplified co-  
769 culture model, lactate (LAC) is used as the sole electron donor and carbon source, and  
770 chloroform (CF) is used as the final electron acceptor. The red crosses (X) represent the missing  
771 genes in *Dhb* genomes; the orange square bracket [heme] represents the lack of heme cofactor in  
772 *Bac* due to the missing heme biosynthesis pathway. **(B)** Proposed genome streamlining between  
773 NADPH-restricted *Dhb* and glutamate-auxotrophic *Bac* demonstrated by complementary genes  
774 in the TCA cycle and in malate metabolism (present in *Dhb*, red; present in *Bac*, blue; present in  
775 both, purple). **(C)** Dechlorination profile of the 4% ACT-3 sub-transfer cultures added with only  
776 lactate (Heme(-)); lactate and heme (Heme(+)); lactate, heme, and malate (0.25 mM; Heme (+)  
777 & MAL). A second feed of lactate (0.5 mM) was given to all the sub-transfer cultures at Day 12  
778 after supernatant sampling. **(D)** LC-MS analysis of malate (red bar) and pyruvate (orange bar) in  
779 the supernatants of Heme (-) and Heme (+) cultures at Day 12. The black asterisks represent that  
780 the metabolites are undetectable. **(E)** Microbial community composition (%) in Heme (-) and  
781 Heme (+) cultures at Day 18 determined using 16S rRNA gene amplicon sequencing.  
782 Abbreviations: AC, acetate; Ac-CoA, acetyl-CoA; DCM, dichloromethane; FUM, fumarate;  
783 OAA, oxaloacetate; SUC, succinate; MAE, malic enzyme; MDH, malate dehydrogenase. Data  
784 are means  $\pm$  SE of three replicates in each experiment as shown on figures.

785 **Table 1. Overall reaction and eQuilibrator-estimated  $\Delta_r G'^0$  mentioned in this study.**

786

|                                                                                  | <b>Reaction</b>                                                            | <b><math>\Delta_r G'^0</math><br/>(kJ/mol)</b> |
|----------------------------------------------------------------------------------|----------------------------------------------------------------------------|------------------------------------------------|
| <b>LAC fermentation by <i>Bacteroides</i></b>                                    | Lactate + 0.5 H <sub>2</sub> O → 0.5 Acetate + 0.5 Malate + H <sub>2</sub> | 23                                             |
| <b>Chloroform dechlorination by <i>Dehalobacter</i></b>                          | CF + H <sub>2</sub> → DCM + HCl                                            | -173                                           |
| <b>Malic enzyme reaction</b>                                                     | Malate + NADP <sup>+</sup> → Pyruvate + CO <sub>2</sub> + NADPH            | 14                                             |
| <b>syntrophic LAC fermentation by <i>Bacteroides</i> and <i>Dehalobacter</i></b> | Lactate + 0.5 H <sub>2</sub> O + CF → 0.5 Acetate + 0.5 Malate + DCM + HCl | -150                                           |
| <b>Interspecies NADH/NADPH exchange achieved by the malate-pyruvate shuttle</b>  | NADH + NADP <sup>+</sup> → NAD <sup>+</sup> + NADPH                        | -2.3                                           |
| <b>AcCoA-dependent ATP synthesis (substrate-level phosphorylation)</b>           | AcCoA + ADP + Pi → Acetate + ATP + CoA                                     | -3.6                                           |

787







# Figure 2

## A

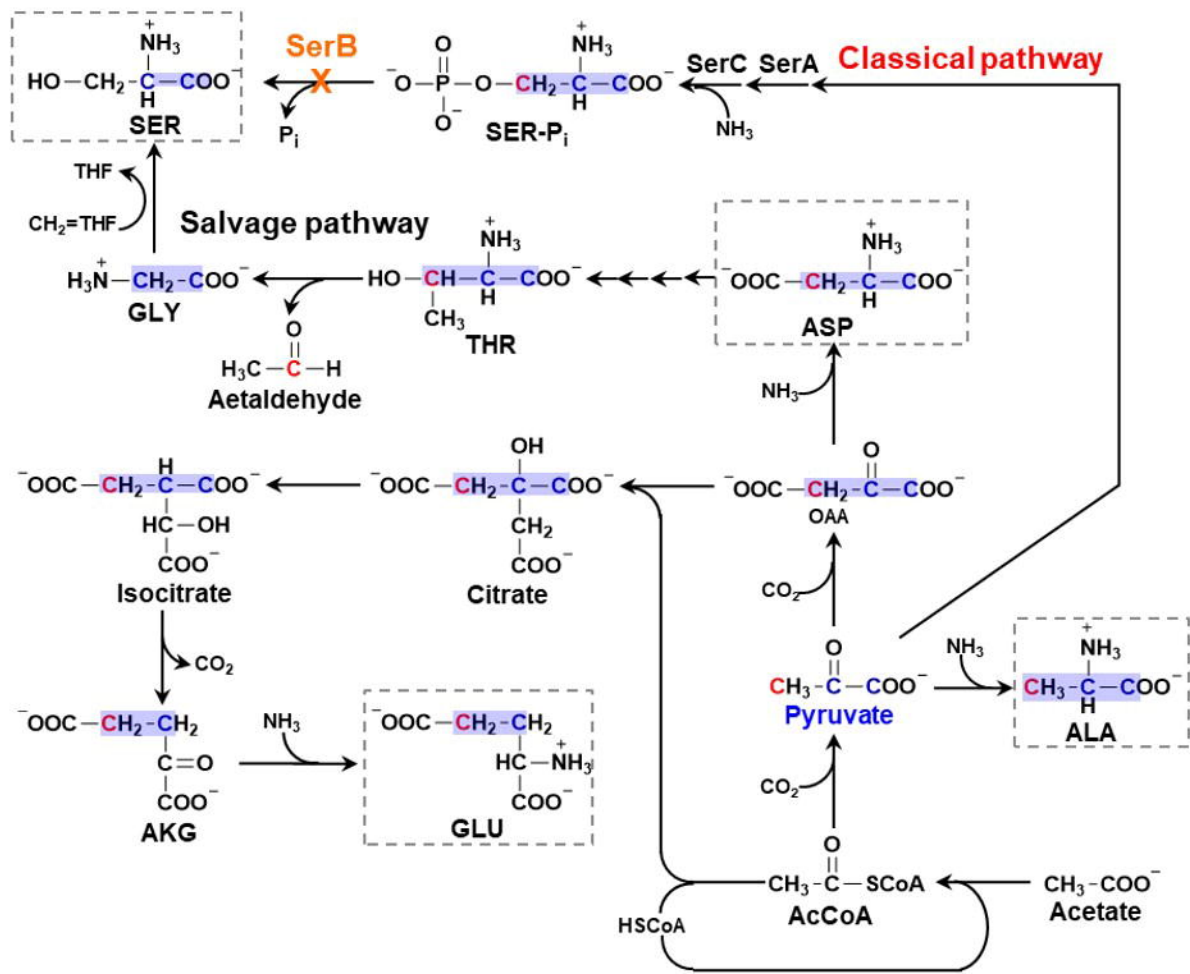

## B

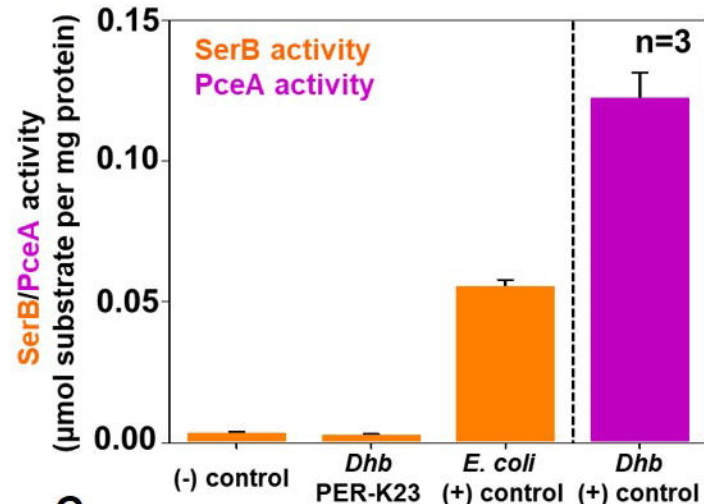

## C

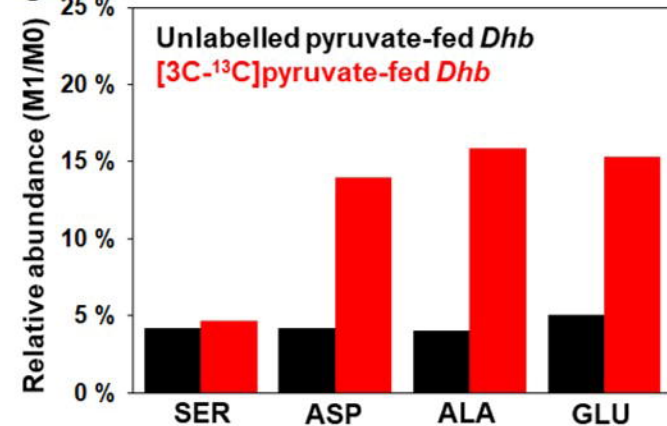

# Figure 3

A

## Central carbon metabolism and redox cofactor regeneration in *Dhb*

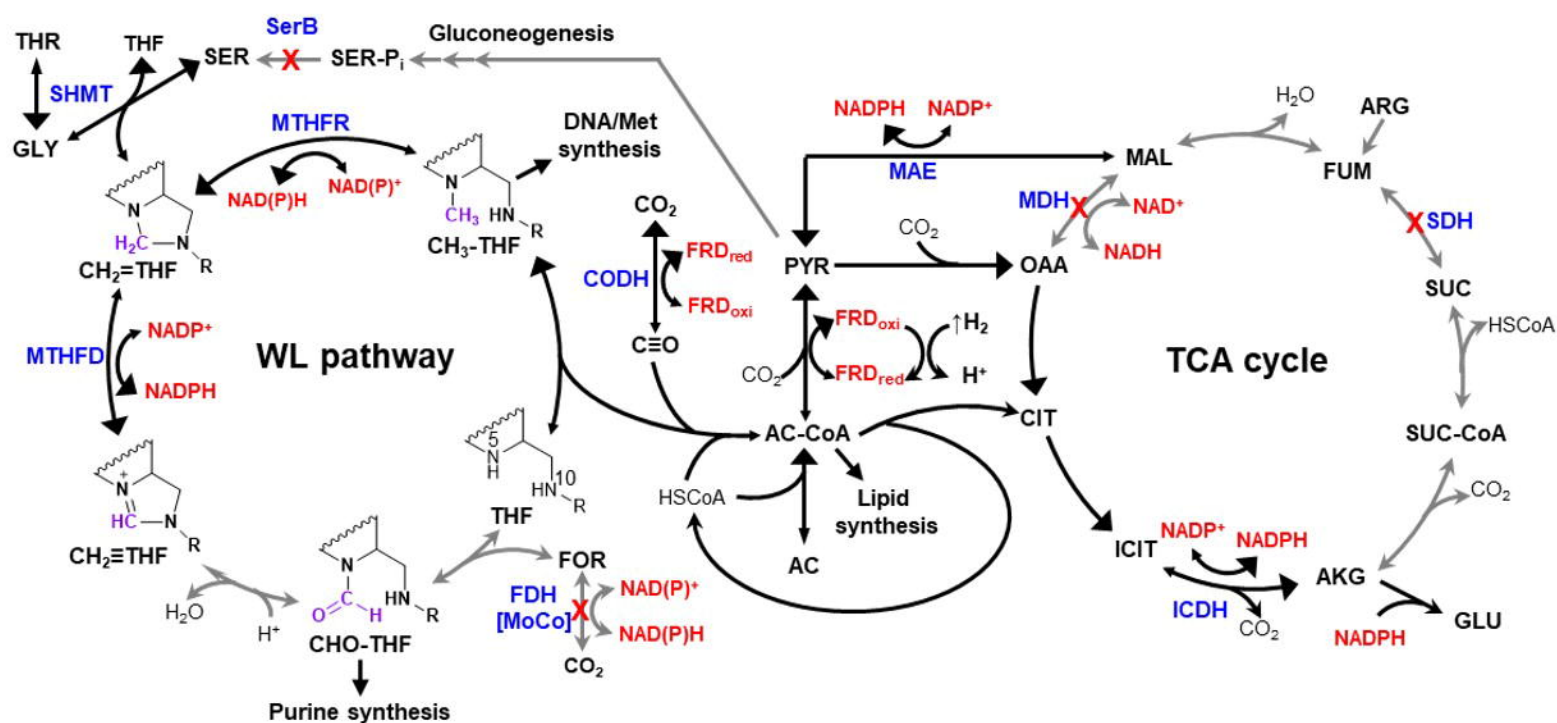

B

## Experimental values of a.a. export in the supernatants of the strain PER-K23 cultures

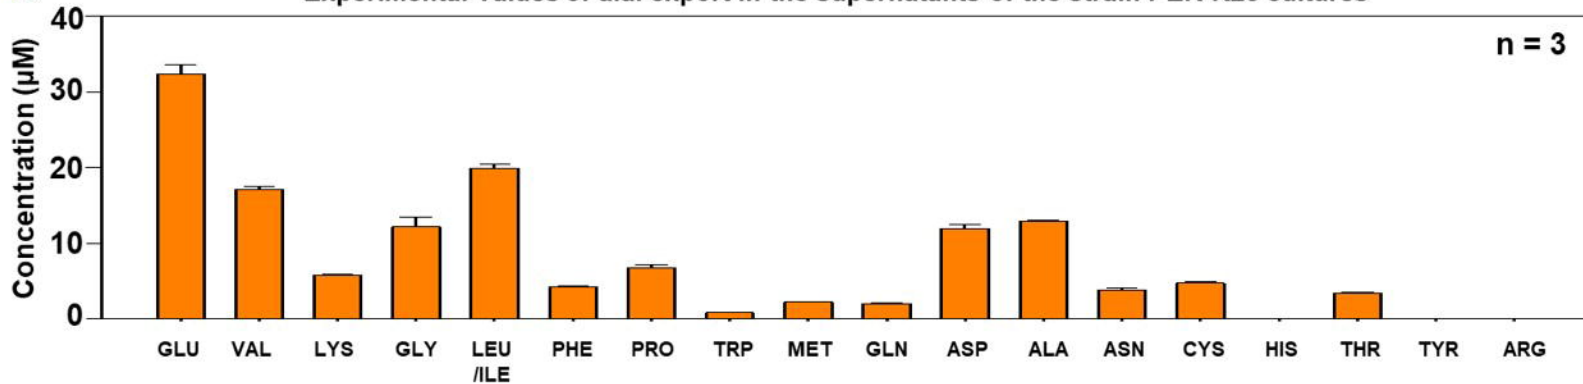

## Theoretical NADPH cost per a.a. synthesized with/without *serB*

|                          | GLU | VAL | LYS | GLY | LEU/ILE | PHE | PRO | TRP | MET | GLN | ASP | ALA | ASN | CYS | HIS | THR | TYR | ARG |
|--------------------------|-----|-----|-----|-----|---------|-----|-----|-----|-----|-----|-----|-----|-----|-----|-----|-----|-----|-----|
| <i>serB</i> <sup>+</sup> | 1   | 4   | 3   | 0   | 3       | 2   | 3   | 4   | 4   | 1   | 1   | 1   | 1   | 0   | 2   | 2   | 2   | 4   |
| <i>serB</i> <sup>-</sup> | 1   | 4   | 3   | 2   | 3       | 2   | 3   | 6   | 6   | 1   | 1   | 1   | 1   | 2   | 2   | 2   | 2   | 4   |

# Figure 4

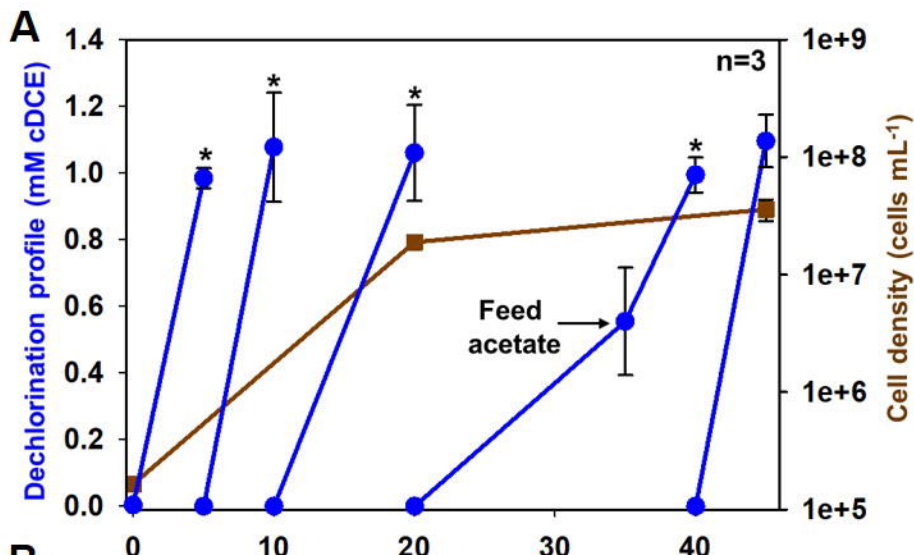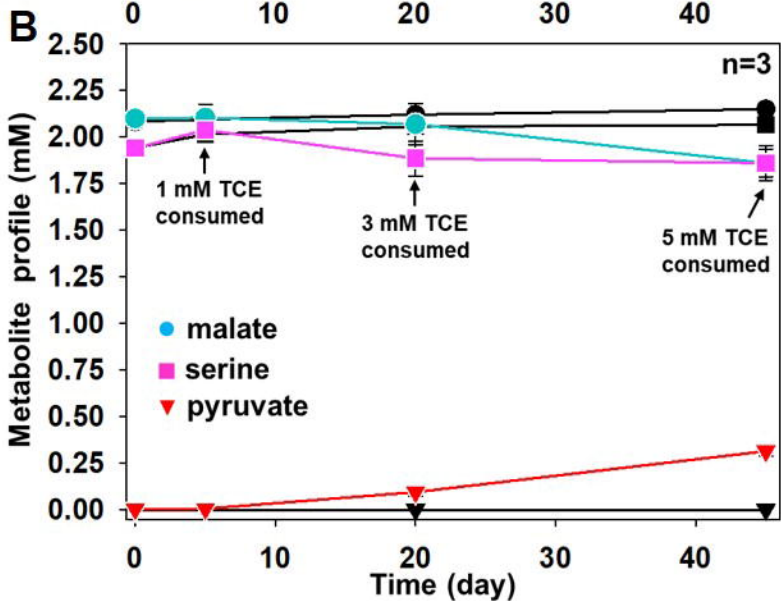

**Figure 5**

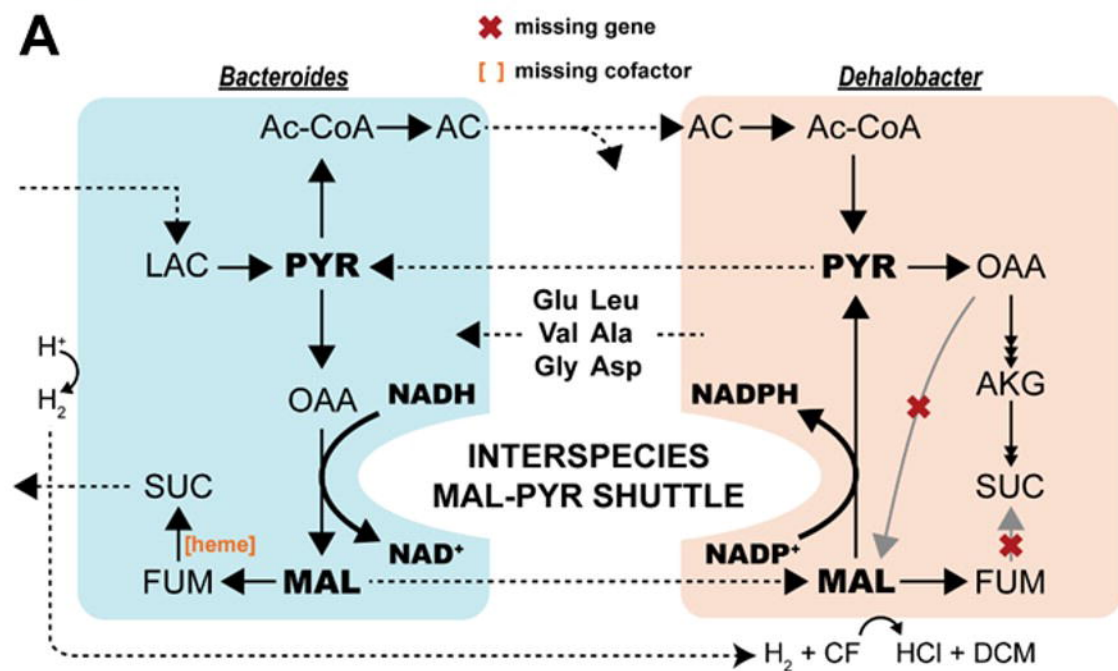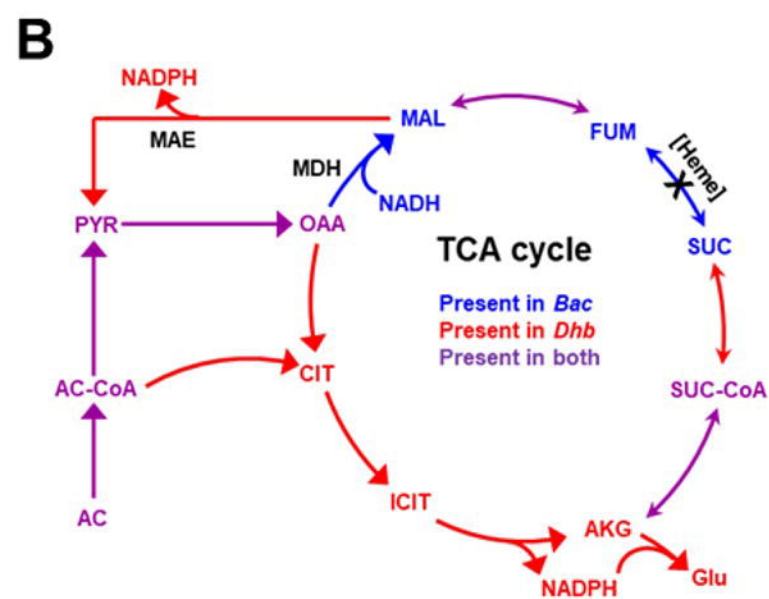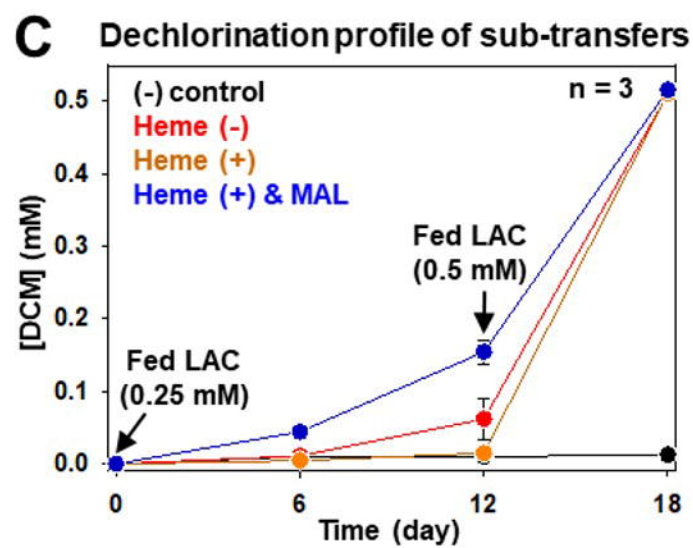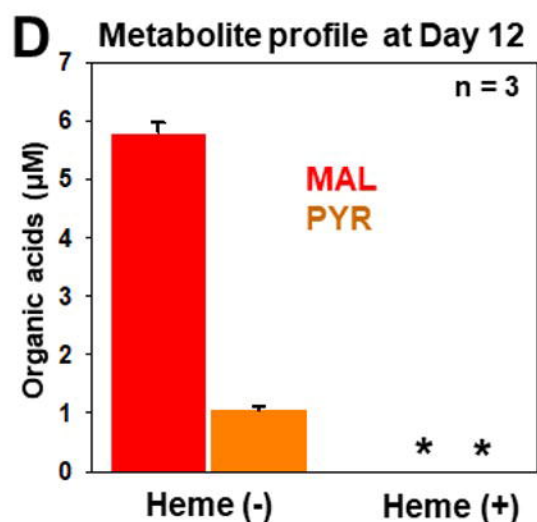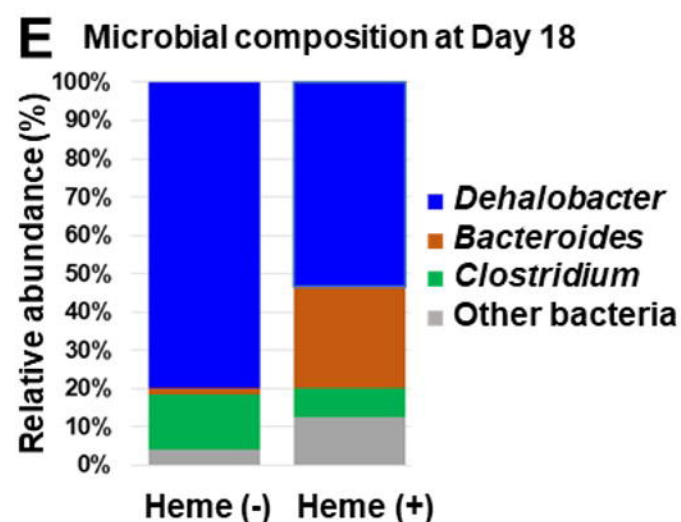

Source: http://biorxiv.org/content/10.1101/379438v1.full.pdf
